# Supplementary material
Source: PubMed Central journal article supplement (PMC3391126)
Supplement: supp_M112.373084_jbc.M112.373084-2.pdf [file supp_M112.373084_jbc.M112.373084-2.pdf]

**Table S2. Candidate miRNA and target gene pairs for glycolysis in lung cancer.**

| miRNA_ID        | miRNA_matchID | miRNA_arrayProbeID           | miRNA Z(M) | Target | Target: Self Expression Z(G) |         | Target: Neighbours' Expression |         | Target: Activity Measure A(G) |         | miRNA-Target Combined Score S(MG)=Z(M)+(-1) <sup>A</sup> A(G) |         |
|-----------------|---------------|------------------------------|------------|--------|------------------------------|---------|--------------------------------|---------|-------------------------------|---------|---------------------------------------------------------------|---------|
|                 |               |                              |            |        | Croce Data                   | GSE7670 | GSE10072                       | GSE7670 | GSE10072                      | GSE7670 | GSE10072                                                      | GSE7670 |
| hsa-miR-182     | hsa-miR-182   | hsa-mir-182-precNo2          | 2.07       | PKD4   | -1.25                        | -2.54   | -0.83                          | -0.56   | -2.07                         | -3.10   | 4.14                                                          | 5.17    |
| hsa-miR-9       | hsa-miR-9     | hsa-mir-009-1No1             | 1.88       | PKD4   | -1.25                        | -2.54   | -0.83                          | -0.56   | -2.07                         | -3.10   | 3.95                                                          | 4.98    |
| hsa-miR-122     | hsa-miR-122   | hsa-mir-122a-prec            | 1.62       | PKD4   | -1.25                        | -2.54   | -0.83                          | -0.56   | -2.07                         | -3.10   | 3.70                                                          | 4.72    |
| hsa-miR-9       | hsa-miR-9     | hsa-mir-009-3No2             | 1.28       | PKD4   | -1.25                        | -2.54   | -0.83                          | -0.56   | -2.07                         | -3.10   | 3.35                                                          | 4.38    |
| hsa-miR-143     | hsa-miR-143   | hsa-mir-143-prec             | -1.62      | PGK1   | 0.84                         | 1.85    | 0.31                           | 1.34    | 1.15                          | 3.19    | -2.78                                                         | -4.82   |
| hsa-miR-195     | hsa-miR-195   | hsa-mir-195-prec             | 1.20       | PKD4   | -1.25                        | -2.54   | -0.83                          | -0.56   | -2.07                         | -3.10   | 3.28                                                          | 4.30    |
| hsa-miR-16      | hsa-miR-16    | hsa-mir-016a-chr13           | 1.19       | PKD4   | -1.25                        | -2.54   | -0.83                          | -0.56   | -2.07                         | -3.10   | 3.26                                                          | 4.29    |
| hsa-miR-34a     | hsa-miR-34    | hsa-mir-034-precNo2          | 0.62       | LDHA   | 2.17                         | 2.91    | 1.47                           | 2.12    | 3.64                          | 5.03    | -3.02                                                         | -4.41   |
| hsa-miR-34c-5p  | hsa-miR-34    | hsa-mir-034-precNo2          | 0.62       | LDHA   | 2.17                         | 2.91    | 1.47                           | 2.12    | 3.64                          | 5.03    | -3.02                                                         | -4.41   |
| hsa-let-7a      | hsa-let-7     | hsa-let-7a-1-prec            | -1.91      | HK2    | 0.18                         | 0.37    | 1.33                           | 1.60    | 1.51                          | 1.97    | -3.42                                                         | -3.88   |
| hsa-miR-195     | hsa-miR-195   | hsa-mir-195-prec             | 1.20       | SLC2A3 | -1.48                        | -1.07   | -1.37                          | -0.96   | -2.85                         | -2.03   | 4.06                                                          | 3.23    |
| hsa-miR-16      | hsa-miR-16    | hsa-mir-016a-chr13           | 1.19       | SLC2A3 | -1.48                        | -1.07   | -1.37                          | -0.96   | -2.85                         | -2.03   | 4.04                                                          | 3.22    |
| hsa-miR-16      | hsa-miR-16    | hsa-mir-016b-chr3            | 0.99       | PKD4   | -1.25                        | -2.54   | -0.83                          | -0.56   | -2.07                         | -3.10   | 3.07                                                          | 4.09    |
| hsa-miR-140-5p  | hsa-miR-140   | hsa-mir-140No1               | -1.02      | SLC2A1 | 1.63                         | 1.89    | 0.47                           | 1.08    | 2.10                          | 2.97    | -3.12                                                         | -3.99   |
| hsa-miR-22      | hsa-miR-22    | hsa-mir-022-prec             | -0.24      | ENO1   | 1.49                         | 2.77    | 0.72                           | 1.63    | 2.21                          | 4.40    | -2.45                                                         | -4.64   |
| hsa-miR-148a    | hsa-miR-148   | hsa-mir-148-prec             | 0.86       | PKD4   | -1.25                        | -2.54   | -0.83                          | -0.56   | -2.07                         | -3.10   | 2.94                                                          | 3.96    |
| hsa-miR-148b    | hsa-miR-148   | hsa-mir-148-prec             | 0.86       | PKD4   | -1.25                        | -2.54   | -0.83                          | -0.56   | -2.07                         | -3.10   | 2.94                                                          | 3.96    |
| hsa-miR-16      | hsa-miR-16    | hsa-mir-016b-chr3            | 0.99       | SLC2A3 | -1.48                        | -1.07   | -1.37                          | -0.96   | -2.85                         | -2.03   | 3.85                                                          | 3.02    |
| hsa-miR-181c    | hsa-miR-181   | hsa-mir-181c-precNo2         | 0.99       | SLC2A3 | -1.48                        | -1.07   | -1.37                          | -0.96   | -2.85                         | -2.03   | 3.84                                                          | 3.02    |
| hsa-miR-181b    | hsa-miR-181   | hsa-mir-181b-precNo2         | 0.98       | SLC2A3 | -1.48                        | -1.07   | -1.37                          | -0.96   | -2.85                         | -2.03   | 3.83                                                          | 3.01    |
| hsa-miR-140-5p  | hsa-miR-140   | hsa-mir-140No2               | -0.87      | SLC2A1 | 1.63                         | 1.89    | 0.47                           | 1.08    | 2.10                          | 2.97    | -2.97                                                         | -3.84   |
| hsa-miR-143     | hsa-miR-143   | hsa-mir-143-prec             | -1.62      | HK2    | 0.18                         | 0.37    | 1.33                           | 1.60    | 1.51                          | 1.97    | -3.13                                                         | -3.59   |
| hsa-miR-148a    | hsa-miR-148   | hsa-mir-148-prec             | 0.86       | SLC2A3 | -1.48                        | -1.07   | -1.37                          | -0.96   | -2.85                         | -2.03   | 3.72                                                          | 2.89    |
| hsa-miR-148b    | hsa-miR-148   | hsa-mir-148-prec             | 0.86       | SLC2A3 | -1.48                        | -1.07   | -1.37                          | -0.96   | -2.85                         | -2.03   | 3.72                                                          | 2.89    |
| hsa-miR-15b     | hsa-miR-15    | hsa-mir-015b-precNo1         | 0.56       | PKD4   | -1.25                        | -2.54   | -0.83                          | -0.56   | -2.07                         | -3.10   | 2.63                                                          | 3.66    |
| hsa-miR-132     | hsa-miR-132   | hsa-mir-132-precNo2          | -0.58      | SLC2A1 | 1.63                         | 1.89    | 0.47                           | 1.08    | 2.10                          | 2.97    | -2.68                                                         | -3.54   |
| hsa-miR-9       | hsa-miR-9     | hsa-mir-009-2No2             | 0.52       | PKD4   | -1.25                        | -2.54   | -0.83                          | -0.56   | -2.07                         | -3.10   | 2.59                                                          | 3.61    |
| hsa-let-7f      | hsa-let-7     | hsa-let-7f-1-precNo1         | -1.36      | HK2    | 0.18                         | 0.37    | 1.33                           | 1.60    | 1.51                          | 1.97    | -2.87                                                         | -3.33   |
| hsa-miR-15b     | hsa-miR-15    | hsa-mir-015b-precNo2         | 0.51       | PKD4   | -1.25                        | -2.54   | -0.83                          | -0.56   | -2.07                         | -3.10   | 2.58                                                          | 3.61    |
| hsa-miR-152     | hsa-miR-152   | hsa-mir-152-precNo1          | 0.42       | PKD4   | -1.25                        | -2.54   | -0.83                          | -0.56   | -2.07                         | -3.10   | 2.49                                                          | 3.52    |
| hsa-miR-15b     | hsa-miR-15    | hsa-mir-015b-precNo1         | 0.56       | SLC2A3 | -1.48                        | -1.07   | -1.37                          | -0.96   | -2.85                         | -2.03   | 3.41                                                          | 2.59    |
| hsa-miR-15a     | hsa-miR-15    | hsa-mir-015a-2-precNo1       | 0.39       | PKD4   | -1.25                        | -2.54   | -0.83                          | -0.56   | -2.07                         | -3.10   | 2.47                                                          | 3.49    |
| hsa-miR-15b     | hsa-miR-15    | hsa-mir-015b-precNo2         | 0.51       | SLC2A3 | -1.48                        | -1.07   | -1.37                          | -0.96   | -2.85                         | -2.03   | 3.36                                                          | 2.54    |
| hsa-miR-152     | hsa-miR-152   | hsa-mir-152-precNo2          | -0.39      | SLC2A1 | 1.63                         | 1.89    | 0.47                           | 1.08    | 2.10                          | 2.97    | -2.49                                                         | -3.36   |
| hsa-miR-212     | hsa-miR-212   | hsa-mir-212-precNo1          | -0.36      | SLC2A1 | 1.63                         | 1.89    | 0.47                           | 1.08    | 2.10                          | 2.97    | -2.47                                                         | -3.33   |
| hsa-miR-152     | hsa-miR-152   | hsa-mir-152-precNo1          | 0.42       | SLC2A3 | -1.48                        | -1.07   | -1.37                          | -0.96   | -2.85                         | -2.03   | 3.27                                                          | 2.45    |
| hsa-miR-130a    | hsa-miR-130   | hsa-mir-130a-precNo1         | -0.32      | SLC2A1 | 1.63                         | 1.89    | 0.47                           | 1.08    | 2.10                          | 2.97    | -2.42                                                         | -3.29   |
| hsa-miR-9       | hsa-miR-9     | hsa-mir-009-1No2             | 0.25       | PKD4   | -1.25                        | -2.54   | -0.83                          | -0.56   | -2.07                         | -3.10   | 2.33                                                          | 3.35    |
| hsa-miR-15a     | hsa-miR-15    | hsa-mir-015a-2-precNo1       | 0.39       | SLC2A3 | -1.48                        | -1.07   | -1.37                          | -0.96   | -2.85                         | -2.03   | 3.25                                                          | 2.42    |
| hsa-miR-34a     | hsa-miR-34    | hsa-mir-034precNo1           | 1.55       | LDHA   | 2.17                         | 2.91    | 1.47                           | 2.12    | 3.64                          | 5.03    | -2.09                                                         | -3.48   |
| hsa-miR-34c-5p  | hsa-miR-34    | hsa-mir-034precNo1           | 1.55       | LDHA   | 2.17                         | 2.91    | 1.47                           | 2.12    | 3.64                          | 5.03    | -2.09                                                         | -3.48   |
| hsa-miR-182     | hsa-miR-182   | hsa-mir-182-precNo1          | 0.20       | PKD4   | -1.25                        | -2.54   | -0.83                          | -0.56   | -2.07                         | -3.10   | 2.27                                                          | 3.29    |
| hsa-miR-22      | hsa-miR-22    | hsa-mir-022-prec             | -0.24      | SLC2A1 | 1.63                         | 1.89    | 0.47                           | 1.08    | 2.10                          | 2.97    | -2.34                                                         | -3.21   |
| hsa-let-7a      | hsa-let-7     | hsa-let-7a-2-precNo1         | -1.02      | HK2    | 0.18                         | 0.37    | 1.33                           | 1.60    | 1.51                          | 1.97    | -2.53                                                         | -2.99   |
| hsa-miR-9       | hsa-miR-9     | hsa-mir-009-3No1             | -1.02      | HK2    | 0.18                         | 0.37    | 1.33                           | 1.60    | 1.51                          | 1.97    | -2.53                                                         | -2.99   |
| hsa-miR-212     | hsa-miR-212   | hsa-mir-212-precNo2          | -0.22      | SLC2A1 | 1.63                         | 1.89    | 0.47                           | 1.08    | 2.10                          | 2.97    | -2.32                                                         | -3.18   |
| hsa-let-7g      | hsa-let-7     | hsa-let-7g-precNo2           | -1.00      | HK2    | 0.18                         | 0.37    | 1.33                           | 1.60    | 1.51                          | 1.97    | -2.51                                                         | -2.97   |
| hsa-miR-181c    | hsa-miR-181   | hsa-mir-181c-precNo1         | 0.22       | SLC2A3 | -1.48                        | -1.07   | -1.37                          | -0.96   | -2.85                         | -2.03   | 3.08                                                          | 2.25    |
| hsa-miR-130a    | hsa-miR-130   | hsa-mir-130a-precNo2         | -0.08      | SLC2A1 | 1.63                         | 1.89    | 0.47                           | 1.08    | 2.10                          | 2.97    | -2.18                                                         | -3.04   |
| hsa-miR-29a     | hsa-miR-29    | hsa-mir-029a-2No1            | 0.16       | SLC2A3 | -1.48                        | -1.07   | -1.37                          | -0.96   | -2.85                         | -2.03   | 3.01                                                          | 2.19    |
| hsa-miR-128     | hsa-miR-128   | hsa-mir-128a-precNo1         | -1.39      | PDK1   | 1.01                         | 1.32    | -0.15                          | 0.21    | 0.85                          | 1.53    | -2.24                                                         | -2.92   |
| hsa-miR-181a    | hsa-miR-181   | hsa-mir-181a-precNo2         | 0.13       | SLC2A3 | -1.48                        | -1.07   | -1.37                          | -0.96   | -2.85                         | -2.03   | 2.98                                                          | 2.16    |
| hsa-let-7d      | hsa-let-7     | hsa-let-7d-v2-precNo1        | -0.82      | HK2    | 0.18                         | 0.37    | 1.33                           | 1.60    | 1.51                          | 1.97    | -2.33                                                         | -2.78   |
| hsa-miR-125b    | hsa-miR-125   | hsa-mir-125b-2-precNo1       | -0.79      | HK2    | 0.18                         | 0.37    | 1.33                           | 1.60    | 1.51                          | 1.97    | -2.29                                                         | -2.75   |
| hsa-miR-217     | hsa-miR-217   | hsa-mir-217-precNo2          | -1.24      | PDHA1  | -0.26                        | 0.20    | 0.89                           | 1.64    | 0.63                          | 1.83    | -1.88                                                         | -3.08   |
| hsa-miR-27b     | hsa-miR-27    | hsa-mir-027b-prec            | -0.17      | PKD4   | -1.25                        | -2.54   | -0.83                          | -0.56   | -2.07                         | -3.10   | 1.70                                                          | 2.93    |
| hsa-miR-181a    | hsa-miR-181   | hsa-mir-181a-precNo1         | -0.12      | SLC2A3 | -1.48                        | -1.07   | -1.37                          | -0.96   | -2.85                         | -2.03   | 2.73                                                          | 1.91    |
| hsa-miR-9       | hsa-miR-9     | hsa-mir-009-2No1             | -0.27      | PKD4   | -1.25                        | -2.54   | -0.83                          | -0.56   | -2.07                         | -3.10   | 1.80                                                          | 2.83    |
| hsa-miR-98      | hsa-miR-98    | hsa-mir-098-prec-X           | -0.47      | HK2    | 0.18                         | 0.37    | 1.33                           | 1.60    | 1.51                          | 1.97    | -1.98                                                         | -2.43   |
| hsa-miR-152     | hsa-miR-152   | hsa-mir-152-precNo2          | -0.39      | PKD4   | -1.25                        | -2.54   | -0.83                          | -0.56   | -2.07                         | -3.10   | 1.68                                                          | 2.71    |
| hsa-miR-181b    | hsa-miR-181   | hsa-mir-181b-precNo1         | -0.27      | SLC2A3 | -1.48                        | -1.07   | -1.37                          | -0.96   | -2.85                         | -2.03   | 2.58                                                          | 1.76    |
| hsa-miR-29a     | hsa-miR-29    | hsa-mir-029a-2No2            | -0.29      | SLC2A3 | -1.48                        | -1.07   | -1.37                          | -0.96   | -2.85                         | -2.03   | 2.57                                                          | 1.74    |
| hsa-miR-34a     | hsa-miR-34    | hsa-mir-034-precNo2          | 0.62       | ALDOA  | 1.58                         | 2.10    | 0.62                           | 1.17    | 2.20                          | 3.27    | -1.58                                                         | -2.65   |
| hsa-miR-34c-5p  | hsa-miR-34    | hsa-mir-034-precNo2          | 0.62       | ALDOA  | 1.58                         | 2.10    | 0.62                           | 1.17    | 2.20                          | 3.27    | -1.58                                                         | -2.65   |
| hsa-miR-152     | hsa-miR-152   | hsa-mir-152-precNo1          | 0.42       | SLC2A1 | 1.63                         | 1.89    | 0.47                           | 1.08    | 2.10                          | 2.97    | -1.68                                                         | -2.55   |
| hsa-miR-27a     | hsa-miR-27    | hsa-mir-027a-prec            | -0.91      | PDK1   | 1.01                         | 1.32    | -0.15                          | 0.21    | 0.85                          | 1.53    | -1.77                                                         | -2.44   |
| hsa-miR-203     | hsa-miR-203   | hsa-mir-203-precNo2          | -0.82      | PDHA1  | -0.26                        | 0.20    | 0.89                           | 1.64    | 0.63                          | 1.83    | -1.46                                                         | -2.66   |
| hsa-miR-152     | hsa-miR-152   | hsa-mir-152-precNo2          | -0.39      | SLC2A3 | -1.48                        | -1.07   | -1.37                          | -0.96   | -2.85                         | -2.03   | 2.46                                                          | 1.64    |
| hsa-miR-146a    | hsa-miR-146   | hsa-mir-146-prec             | -0.40      | SLC2A3 | -1.48                        | -1.07   | -1.37                          | -0.96   | -2.85                         | -2.03   | 2.45                                                          | 1.63    |
| hsa-miR-146b-5p | hsa-miR-146   | hsa-mir-146-prec             | -0.40      | SLC2A3 | -1.48                        | -1.07   | -1.37                          | -0.96   | -2.85                         | -2.03   | 2.45                                                          | 1.63    |
| hsa-miR-217     | hsa-miR-217   | hsa-mir-217-precNo1          | -0.80      | PDHA1  | -0.26                        | 0.20    | 0.89                           | 1.64    | 0.63                          | 1.83    | -1.43                                                         | -2.63   |
| hsa-miR-9       | hsa-miR-9     | hsa-mir-009-2No1             | -0.27      | HK2    | 0.18                         | 0.37    | 1.33                           | 1.60    | 1.51                          | 1.97    | -1.78                                                         | -2.24   |
| hsa-miR-128     | hsa-miR-128   | hsa-mir-128a-precNo1         | -1.39      | PDHX   | -0.26                        | 0.46    | 0.08                           | 0.92    | -0.18                         | 1.37    | -1.21                                                         | -2.76   |
| hsa-miR-125a-5p | hsa-miR-125   | hsa-mir-125a-precNo2         | -0.21      | HK2    | 0.18                         | 0.37    | 1.33                           | 1.60    | 1.51                          | 1.97    | -1.71                                                         | -2.17   |
| hsa-let-7f      | hsa-let-7     | hsa-let-7f-2-prec2           | -0.13      | HK2    | 0.18                         | 0.37    | 1.33                           | 1.60    | 1.51                          | 1.97    | -1.64                                                         | -2.09   |
| hsa-let-7d      | hsa-let-7     | hsa-let-7d-v1-prec           | -0.12      | HK2    | 0.18                         | 0.37    | 1.33                           | 1.60    | 1.51                          | 1.97    | -1.62                                                         | -2.08   |
| hsa-miR-15a     | hsa-miR-15    | hsa-mir-015a-2-precNo2       | -0.75      | PKD4   | -1.25                        | -2.54   | -0.83                          | -0.56   | -2.07                         | -3.10   | 1.32                                                          | 2.35    |
| hsa-miR-29c     | hsa-miR-29    | hsa-mir-029c-prec            | -0.62      | SLC2A3 | -1.48                        | -1.07   | -1.37                          | -0.96   | -2.85                         | -2.03   | 2.23                                                          | 1.41    |
| hsa-miR-198     | hsa-miR-198   | hsa-mir-198-prec             | 0.72       | SLC2A1 | 1.63                         | 1.89    | 0.47                           | 1.08    | 2.10                          | 2.97    | -1.38                                                         | -2.24   |
| hsa-miR-26b     | hsa-miR-26    | hsa-mir-026b-prec            | -1.10      | PDHX   | -0.26                        | 0.46    | 0.08                           | 0.92    | -0.18                         | 1.37    | -0.92                                                         | -2.47   |
| hsa-miR-15a     | hsa-miR-15    | hsa-mir-015a-2-precNo2       | -0.75      | SLC2A3 | -1.48                        | -1.07   | -1.37                          | -0.96   | -2.85                         | -2.03   | 2.11                                                          | 1.28    |
| hsa-miR-122     | hsa-miR-122   | hsa-mir-122a-prec            | 1.62       | PKM2   | 1.12                         | 1.90    | 1.53                           | 2.08    | 2.65                          | 3.98    | -1.03                                                         | -2.36   |
| hsa-miR-27a     | hsa-miR-27    | hsa-mir-027a-prec            | -0.91      | PKD4   | -1.25                        | -2.54   | -0.83                          | -0.56   | -2.07                         | -3.10   | 1.16                                                          | 2.19    |
| hsa-miR-148a    | hsa-miR-148   | hsa-mir-148-prec             | 0.86       | SLC2A1 | 1.63                         | 1.89    | 0.47                           | 1.08    | 2.10                          | 2.97    | -1.24                                                         | -2.10   |
| hsa-miR-148b    | hsa-miR-148   | hsa-mir-148-prec             | 0.86       | SLC2A1 | 1.63                         | 1.89    | 0.47                           | 1.08    | 2.10                          | 2.97    | -1.24                                                         | -2.10   |
| hsa-miR-132     | hsa-miR-132   | hsa-mir-132-precNo1          | 0.91       | SLC2A1 | 1.63                         | 1.89    | 0.47                           | 1.08    | 2.10                          | 2.97    | -1.20                                                         | -2.06   |
| hsa-miR-29b     | hsa-miR-29    | hsa-mir-29b-2-102prec7.1=7.2 | -1.01      | PDHX   | -0.26                        | 0.46    |                                |         |                               |         |                                                               |         |

|                |             |                              |       |         |       |       |       |       |       |       |       |       |
|----------------|-------------|------------------------------|-------|---------|-------|-------|-------|-------|-------|-------|-------|-------|
| hsa-miR-26a    | hsa-miR-26  | hsa-mir-026a-precNo2         | -0.92 | PDHX    | -0.26 | 0.46  | 0.08  | 0.92  | -0.18 | 1.37  | -0.75 | -2.30 |
| hsa-miR-26a    | hsa-miR-26  | hsa-mir-026a-precNo2         | -0.92 | SLC2A3  | -1.48 | -1.07 | -1.37 | -0.96 | -2.85 | -2.03 | 1.93  | 1.11  |
| hsa-miR-130a   | hsa-miR-130 | hsa-mir-130a-precNo1         | -0.32 | PDK1    | 1.01  | 1.32  | -0.15 | 0.21  | 0.85  | 1.53  | -1.17 | -1.85 |
| hsa-miR-27a    | hsa-miR-27  | hsa-mir-027a-prec            | -0.91 | PDHX    | -0.26 | 0.46  | 0.08  | 0.92  | -0.18 | 1.37  | -0.74 | -2.28 |
| hsa-miR-9      | hsa-miR-9   | hsa-mir-009-1No2             | 0.25  | HK2     | 0.18  | 0.37  | 1.33  | 1.60  | 1.51  | 1.97  | -1.25 | -1.71 |
| hsa-miR-26a    | hsa-miR-26  | hsa-mir-026a-precNo1         | -0.98 | SLC2A3  | -1.48 | -1.07 | -1.37 | -0.96 | -2.85 | -2.03 | 1.87  | 1.05  |
| hsa-miR-29b    | hsa-miR-29  | hsa-mir-29b-2-102prec7.1=7.2 | -1.01 | SLC2A3  | -1.48 | -1.07 | -1.37 | -0.96 | -2.85 | -2.03 | 1.84  | 1.02  |
| hsa-let-7d     | hsa-let-7   | hsa-let-7d-prec              | 0.31  | HK2     | 0.18  | 0.37  | 1.33  | 1.60  | 1.51  | 1.97  | -1.19 | -1.65 |
| hsa-let-7b     | hsa-let-7   | hsa-let-7b-prec              | 0.35  | HK2     | 0.18  | 0.37  | 1.33  | 1.60  | 1.51  | 1.97  | -1.16 | -1.62 |
| hsa-miR-27b    | hsa-miR-27  | hsa-mir-027b-prec            | -0.17 | PDK1    | 1.01  | 1.32  | -0.15 | 0.21  | 0.85  | 1.53  | -1.02 | -1.70 |
| hsa-let-7c     | hsa-let-7   | hsa-let-7c-prec              | 0.38  | HK2     | 0.18  | 0.37  | 1.33  | 1.60  | 1.51  | 1.97  | -1.13 | -1.59 |
| hsa-miR-26b    | hsa-miR-26  | hsa-mir-026b-prec            | -1.10 | SLC2A3  | -1.48 | -1.07 | -1.37 | -0.96 | -2.85 | -2.03 | 1.76  | 0.93  |
| hsa-miR-194    | hsa-miR-194 | hsa-mir-194-precNo1          | -0.97 | PDHB    | -0.86 | 0.18  | 0.27  | 1.13  | -0.59 | 1.32  | -0.39 | -2.29 |
| hsa-miR-125b   | hsa-miR-125 | hsa-mir-125b-2-precNo2       | 0.40  | HK2     | 0.18  | 0.37  | 1.33  | 1.60  | 1.51  | 1.97  | -1.11 | -1.56 |
| hsa-miR-17     | hsa-miR-17  | hsa-mir-017-precNo2          | 1.52  | SLC2A4  | 0.27  | -0.16 | 0.45  | -0.13 | 0.72  | -0.29 | 0.80  | 1.81  |
| hsa-miR-204    | hsa-miR-204 | hsa-mir-204-precNo2          | -0.79 | C12orf5 | -0.47 | 0.20  | 0.18  | 1.11  | -0.29 | 1.32  | -0.50 | -2.11 |
| hsa-let-7a     | hsa-let-7   | hsa-let-7a-2-precNo2         | 0.45  | HK2     | 0.18  | 0.37  | 1.33  | 1.60  | 1.51  | 1.97  | -1.06 | -1.52 |
| hsa-miR-130a   | hsa-miR-130 | hsa-mir-130a-precNo2         | -0.08 | PDK1    | 1.01  | 1.32  | -0.15 | 0.21  | 0.85  | 1.53  | -0.93 | -1.60 |
| hsa-let-7a     | hsa-let-7   | hsa-let-7a-3-prec            | 0.49  | HK2     | 0.18  | 0.37  | 1.33  | 1.60  | 1.51  | 1.97  | -1.02 | -1.48 |
| hsa-miR-9      | hsa-miR-9   | hsa-mir-009-2No2             | 0.52  | HK2     | 0.18  | 0.37  | 1.33  | 1.60  | 1.51  | 1.97  | -0.99 | -1.45 |
| hsa-miR-29c    | hsa-miR-29  | hsa-mir-029c-prec            | -0.62 | PDHX    | -0.26 | 0.46  | 0.08  | 0.92  | -0.18 | 1.37  | -0.44 | -1.99 |
| hsa-miR-106a   | hsa-miR-106 | hsa-mir-106-prec-X           | 1.43  | SLC2A4  | 0.27  | -0.16 | 0.45  | -0.13 | 0.72  | -0.29 | 0.71  | 1.72  |
| hsa-miR-106b   | hsa-miR-106 | hsa-mir-106-prec-X           | 1.43  | SLC2A4  | 0.27  | -0.16 | 0.45  | -0.13 | 0.72  | -0.29 | 0.71  | 1.72  |
| hsa-miR-34a    | hsa-miR-34  | hsa-mir-034precNo1           | 1.55  | ALDOA   | 1.58  | 2.10  | 0.62  | 1.17  | 2.20  | 3.27  | -0.65 | -1.72 |
| hsa-miR-34c-5p | hsa-miR-34  | hsa-mir-034precNo1           | 1.55  | ALDOA   | 1.58  | 2.10  | 0.62  | 1.17  | 2.20  | 3.27  | -0.65 | -1.72 |
| hsa-miR-135a   | hsa-miR-135 | hsa-mir-135-2-prec           | -0.57 | PDHX    | -0.26 | 0.46  | 0.08  | 0.92  | -0.18 | 1.37  | -0.40 | -1.94 |
| hsa-miR-135b   | hsa-miR-135 | hsa-mir-135-2-prec           | -0.57 | PDHX    | -0.26 | 0.46  | 0.08  | 0.92  | -0.18 | 1.37  | -0.40 | -1.94 |
| hsa-miR-125b   | hsa-miR-125 | hsa-mir-125b-1               | 0.58  | HK2     | 0.18  | 0.37  | 1.33  | 1.60  | 1.51  | 1.97  | -0.93 | -1.39 |
| hsa-let-7e     | hsa-let-7   | hsa-let-7e-prec              | 0.60  | HK2     | 0.18  | 0.37  | 1.33  | 1.60  | 1.51  | 1.97  | -0.91 | -1.37 |
| hsa-miR-20a    | hsa-miR-20  | hsa-mir-020-prec             | 1.33  | SLC2A4  | 0.27  | -0.16 | 0.45  | -0.13 | 0.72  | -0.29 | 0.61  | 1.62  |
| hsa-miR-20b    | hsa-miR-20  | hsa-mir-020-prec             | 1.33  | SLC2A4  | 0.27  | -0.16 | 0.45  | -0.13 | 0.72  | -0.29 | 0.61  | 1.62  |
| hsa-miR-122    | hsa-miR-122 | hsa-mir-122a-prec            | 1.62  | ALDOA   | 1.58  | 2.10  | 0.62  | 1.17  | 2.20  | 3.27  | -0.58 | -1.65 |
| hsa-let-7f     | hsa-let-7   | hsa-let-7f-1-precNo2         | 0.64  | HK2     | 0.18  | 0.37  | 1.33  | 1.60  | 1.51  | 1.97  | -0.86 | -1.32 |
| hsa-let-7g     | hsa-let-7   | hsa-let-7g-precNo1           | 0.65  | HK2     | 0.18  | 0.37  | 1.33  | 1.60  | 1.51  | 1.97  | -0.85 | -1.31 |
| hsa-miR-144    | hsa-miR-144 | hsa-mir-144-precNo1          | -0.56 | C12orf5 | -0.47 | 0.20  | 0.18  | 1.11  | -0.29 | 1.32  | -0.27 | -1.88 |
| hsa-miR-31     | hsa-miR-31  | hsa-mir-031-prec             | 1.24  | SLC2A4  | 0.27  | -0.16 | 0.45  | -0.13 | 0.72  | -0.29 | 0.52  | 1.53  |
| hsa-miR-128    | hsa-miR-128 | hsa-mir-128b-precNo1         | 2.20  | PDK1    | 1.01  | 1.32  | -0.15 | 0.21  | 0.85  | 1.53  | 1.34  | 0.67  |
| hsa-miR-93     | hsa-miR-93  | hsa-mir-093-prec-7.1=093-1   | 1.17  | SLC2A4  | 0.27  | -0.16 | 0.45  | -0.13 | 0.72  | -0.29 | 0.45  | 1.46  |
| hsa-miR-204    | hsa-miR-204 | hsa-mir-204-precNo1          | -0.43 | C12orf5 | -0.47 | 0.20  | 0.18  | 1.11  | -0.29 | 1.32  | -0.14 | -1.75 |
| hsa-miR-211    | hsa-miR-211 | hsa-mir-211-precNo2          | -0.41 | C12orf5 | -0.47 | 0.20  | 0.18  | 1.11  | -0.29 | 1.32  | -0.13 | -1.73 |
| hsa-miR-29a    | hsa-miR-29  | hsa-mir-029a-2No2            | -0.29 | PDHX    | -0.26 | 0.46  | 0.08  | 0.92  | -0.18 | 1.37  | -0.11 | -1.66 |
| hsa-miR-135a   | hsa-miR-135 | hsa-mir-135-1-prec           | -0.23 | PDHX    | -0.26 | 0.46  | 0.08  | 0.92  | -0.18 | 1.37  | -0.06 | -1.60 |
| hsa-miR-135b   | hsa-miR-135 | hsa-mir-135-1-prec           | -0.23 | PDHX    | -0.26 | 0.46  | 0.08  | 0.92  | -0.18 | 1.37  | -0.06 | -1.60 |
| hsa-miR-152    | hsa-miR-152 | hsa-mir-152-precNo1          | 0.42  | PDK1    | 1.01  | 1.32  | -0.15 | 0.21  | 0.85  | 1.53  | -0.43 | -1.11 |
| hsa-miR-27b    | hsa-miR-27  | hsa-mir-027b-prec            | -0.17 | PDHX    | -0.26 | 0.46  | 0.08  | 0.92  | -0.18 | 1.37  | 0.01  | -1.54 |
| hsa-miR-17     | hsa-miR-17  | hsa-mir-017-precNo1          | -0.50 | SLC2A4  | 0.27  | -0.16 | 0.45  | -0.13 | 0.72  | -0.29 | -1.22 | -0.21 |
| hsa-miR-128    | hsa-miR-128 | hsa-mir-128b-precNo2         | 0.51  | PDK1    | 1.01  | 1.32  | -0.15 | 0.21  | 0.85  | 1.53  | -0.34 | -1.01 |
| hsa-miR-144    | hsa-miR-144 | hsa-mir-144-precNo2          | -0.15 | C12orf5 | -0.47 | 0.20  | 0.18  | 1.11  | -0.29 | 1.32  | 0.14  | -1.46 |
| hsa-miR-203    | hsa-miR-203 | hsa-mir-203-precNo1          | 0.61  | PDHA1   | -0.26 | 0.20  | 0.89  | 1.64  | 0.63  | 1.83  | -0.03 | -1.23 |
| hsa-miR-188-5p | hsa-miR-188 | hsa-mir-188-prec             | -0.11 | C12orf5 | -0.47 | 0.20  | 0.18  | 1.11  | -0.29 | 1.32  | 0.18  | -1.42 |
| hsa-miR-128    | hsa-miR-128 | hsa-mir-128a-precNo2         | 0.61  | PDK1    | 1.01  | 1.32  | -0.15 | 0.21  | 0.85  | 1.53  | -0.25 | -0.92 |
| hsa-miR-9      | hsa-miR-9   | hsa-mir-009-3No2             | 1.28  | HK2     | 0.18  | 0.37  | 1.33  | 1.60  | 1.51  | 1.97  | -0.23 | -0.68 |
| hsa-miR-29a    | hsa-miR-29  | hsa-mir-029a-2No1            | 0.16  | PDHX    | -0.26 | 0.46  | 0.08  | 0.92  | -0.18 | 1.37  | 0.33  | -1.21 |
| hsa-miR-148a   | hsa-miR-148 | hsa-mir-148-prec             | 0.86  | PDK1    | 1.01  | 1.32  | -0.15 | 0.21  | 0.85  | 1.53  | 0.01  | -0.66 |
| hsa-miR-148b   | hsa-miR-148 | hsa-mir-148-prec             | 0.86  | PDK1    | 1.01  | 1.32  | -0.15 | 0.21  | 0.85  | 1.53  | 0.01  | -0.66 |
| hsa-miR-211    | hsa-miR-211 | hsa-mir-211-precNo1          | 0.73  | C12orf5 | -0.47 | 0.20  | 0.18  | 1.11  | -0.29 | 1.32  | 1.02  | -0.59 |
| hsa-let-7d     | hsa-let-7   | hsa-let-7d-v2-precNo2        | 1.55  | HK2     | 0.18  | 0.37  | 1.33  | 1.60  | 1.51  | 1.97  | 0.04  | -0.41 |
| hsa-miR-101    | hsa-miR-101 | hsa-mir-101-prec-9           | 0.34  | C12orf5 | -0.47 | 0.20  | 0.18  | 1.11  | -0.29 | 1.32  | 0.63  | -0.98 |
| hsa-miR-101    | hsa-miR-101 | hsa-mir-101-1/2-precNo1      | 0.68  | C12orf5 | -0.47 | 0.20  | 0.18  | 1.11  | -0.29 | 1.32  | 0.97  | -0.64 |
| hsa-miR-9      | hsa-miR-9   | hsa-mir-009-1No1             | 1.88  | HK2     | 0.18  | 0.37  | 1.33  | 1.60  | 1.51  | 1.97  | 0.37  | -0.09 |
| hsa-miR-194    | hsa-miR-194 | hsa-mir-194-precNo2          | 0.49  | PDHB    | -0.86 | 0.18  | 0.27  | 1.13  | -0.59 | 1.32  | 1.07  | -0.83 |
| hsa-miR-128    | hsa-miR-128 | hsa-mir-128b-precNo2         | 0.51  | PDHX    | -0.26 | 0.46  | 0.08  | 0.92  | -0.18 | 1.37  | 0.69  | -0.86 |
| hsa-miR-202    | hsa-miR-202 | hsa-mir-202-prec             | 1.66  | HK2     | 0.18  | 0.37  | 1.33  | 1.60  | 1.51  | 1.97  | 0.15  | -0.31 |
| hsa-miR-101    | hsa-miR-101 | hsa-mir-101-1/2-precNo2      | 0.48  | C12orf5 | -0.47 | 0.20  | 0.18  | 1.11  | -0.29 | 1.32  | 0.77  | -0.84 |
| hsa-miR-128    | hsa-miR-128 | hsa-mir-128a-precNo2         | 0.61  | PDHX    | -0.26 | 0.46  | 0.08  | 0.92  | -0.18 | 1.37  | 0.78  | -0.76 |
